# Supplementary material for: Assessing the Economic Contribution of Ocean-Based Activities Using the Pacific Coast of British Columbia as a Case Study
Source: MDPI journal article supplement (doi:10.3390/su14148662), 2022-07-15
Supplement: s1 [file s1]

## Supplementary Materials

**Table S1.** Input variables and derivation of total revenue in each ocean-based sector.

| Sector                          | Variables for Calculating Revenue                         | Calculation       | Data Source                                      | Reference |
|---------------------------------|-----------------------------------------------------------|-------------------|--------------------------------------------------|-----------|
| Living Sector                   |                                                           |                   |                                                  |           |
| Marine recreation and tourism   |                                                           |                   |                                                  |           |
| Whale watching                  | No. of participants ( $p$ )                               | $P * e$           | Tourism statistics, independent surveys          | [1]       |
|                                 | Expenditure/participant (\$/person) ( $e$ )               |                   | Independent surveys                              | [1]       |
| Ocean-side activities           | No. of tourist arrivals ( $ta$ )                          | $ta * s * te$     | BC Stats tourism statistics                      | [2]       |
|                                 | % of tourists motivated by 'sea' ( $s$ )                  |                   | Proxy indicator from independent surveys         |           |
|                                 | Expenditure/tourist (\$/person) ( $te$ )                  |                   | Provincial tourism statistics/ technical reports | [3]       |
| Beachactivities (locals)        | BC residents in coastal area >15 years of age ( $ca$ )    | $ca * b * be$     | BC Stats population statistics                   | [4]       |
|                                 | Participation rate (%) in beach activities ( $b$ )        |                   | Independent survey                               | [5]       |
|                                 | Average expenditure/ participant (\$/person/day) ( $be$ ) |                   | Author's estimate                                |           |
| Kayaking (self-guided, locals)  | BC residents in coastal area >15 years of age ( $ca$ )    | $ca * k * ke * d$ | BC Stats population statistics                   | [4]       |
|                                 | Participation rate (%) in kayaking ( $k$ )                |                   | Independent survey                               | [6]       |
|                                 | Average expenditure/ participant (\$/person/day) ( $ke$ ) |                   | Independent survey                               | [6]       |
|                                 | Number of days/year of kayaking ( $d$ )                   |                   | Independent survey                               | [6]       |
| Recreational fishing            | Recreational catch (tonnes) ( $rc$ )                      | $rc * ae$         | Sea Around Us catch database                     |           |
|                                 | Angling expenditure (\$/tonne) ( $ae$ )                   |                   |                                                  | [11]      |
| Capture fisheries               | Fisheries catch (tonnes) ( $f$ )                          | $f * pr$          | Sea Around Us catch database                     |           |
|                                 | Fish price (\$/tonne) ( $pr$ )                            |                   | Ex-vessel price database                         |           |
| Seafood processing              | Landed value (\$) ( $lv$ )                                | $lv * (1+va)$     | Sea Around Us catch database                     |           |
|                                 | Processing value added (%) ( $va$ )                       |                   | Independent surveys                              | [12,13]   |
| Non-Living Sector               |                                                           |                   |                                                  |           |
| Marine transport                |                                                           |                   |                                                  |           |
| Marine shipping                 | Total cargo handled (tonnes) ( $cg$ )                     | $cg * fte$        | Port statistics                                  | [9,14]    |
|                                 | FTE/tonnage (no. of jobs/tonne) ( $fte$ )                 |                   | Independent surveys                              | [9]       |
| Freight and passenger transport | BC Ferries revenue                                        |                   | Independent surveys                              | [16]      |
| Support services                | Extracted from Statistics Canada                          |                   | Statistics Canada                                | [15]      |

|              |                                                   |                                                   |                               |       |
|--------------|---------------------------------------------------|---------------------------------------------------|-------------------------------|-------|
| Cruise lines | Annual # of cruise vessels ( <i>cr</i> )          | $(cr * ve) + (pa * dmp * spa) + (cw * dmc * scw)$ | Port statistics               | [7,8] |
|              | Avg vessel expenditure ( <i>ve</i> )              |                                                   | Independent survey            | [9]   |
|              | Annual passenger arrivals ( <i>pa</i> )           |                                                   | Provincial tourism statistics | [7]   |
|              | Annual # of crew ( <i>cw</i> )                    |                                                   | Independent surveys           | [8]   |
|              | % of passengers that disembark ( <i>dmp</i> )     |                                                   | Independent surveys           | [8]   |
|              | % of crew that disembark ( <i>dmc</i> )           |                                                   | Independent surveys           | [8]   |
|              | Avg spending/passenger (\$/person) ( <i>spa</i> ) |                                                   | Independent surveys           | [10]  |
|              | Avg spending/crew (\$/person) ( <i>scw</i> )      |                                                   | Independent surveys           | [10]  |

Table S2. Range of variance used to derive GDP from total revenue in ocean sectors.

| Method                        |                                                                                                                                                                   | Variance Low | Variance High | Year                    | Source |
|-------------------------------|-------------------------------------------------------------------------------------------------------------------------------------------------------------------|--------------|---------------|-------------------------|--------|
| Living sector                 |                                                                                                                                                                   |              |               |                         |        |
| Marine recreation and tourism | Annually reported GDP divided by Revenue in the BC tourism sector                                                                                                 | 0.487–0.529  | 0.529         | 2006–2014               | [17]   |
| Seafood processing            | Manufacturing value added/Total revenue.                                                                                                                          | 0.3          | 0.37          | 2004–2015               | [18]   |
| Capture Fisheries             | GDP to output ratio                                                                                                                                               | 0.42         | 0.893         | 2009 (halibut)          | [19]   |
| Recreational fishing          | GDP to expenditure ratio. Expenditure derived from DFO recreational fishing surveys [20]; GDP generated from Statistics Canada interprovincial input–output model | 0.23         | 0.44          | 2006 (high), 2012 (low) | [20]   |
| Non-living sector             |                                                                                                                                                                   |              |               |                         |        |
| Cruise lines                  | Annually reported GDP divided by Revenue in the BC tourism sector                                                                                                 | 0.487–0.529  | 0.529         | 2006–2014               | [17]   |
| Marine shipping               | Port of Metro Vancouver expenses to operating cost ratio                                                                                                          | 0.38         |               | 2015                    | [9]    |
| Marine support services       | British Columbia input–output model                                                                                                                               | na           | na            |                         |        |

**Table S3.** Input–output multipliers.

| SM 3A. Ocean sectors matched to Statistics Canada industries for input-output multiplier values.    |                 |                                                                                                                                            |                                           |                                       |         |                      |
|-----------------------------------------------------------------------------------------------------|-----------------|--------------------------------------------------------------------------------------------------------------------------------------------|-------------------------------------------|---------------------------------------|---------|----------------------|
| <u>Ocean sector</u>                                                                                 |                 | <u>Statistics Canada Industry</u>                                                                                                          |                                           |                                       |         |                      |
| Capture fisheries                                                                                   |                 | Fishing, hunting and trapping                                                                                                              |                                           |                                       |         |                      |
| Marine recreation and tourism                                                                       |                 | Tourism (derived from other data sources)                                                                                                  |                                           |                                       |         |                      |
| Marine shipping                                                                                     |                 | Support activities for transportation                                                                                                      |                                           |                                       |         |                      |
| Marine support services                                                                             |                 | Water transportation                                                                                                                       |                                           |                                       |         |                      |
| Seafood processing                                                                                  |                 | Fruit and vegetable preserving and specialty food manufacturing (direct); Seafood product preparation and packaging (indirect and induced) |                                           |                                       |         |                      |
|                                                                                                     |                 |                                                                                                                                            |                                           |                                       |         |                      |
| SM 3B. Direct, indirect and induced multipliers used to calculate economic impact of ocean sectors. |                 |                                                                                                                                            |                                           |                                       |         |                      |
|                                                                                                     |                 | Fruit and Vegetable Mfg                                                                                                                    | Seafood Product Preparation and Packaging | Support Activities for Transportation | Tourism | Water Transportation |
| Direct                                                                                              | Output          | 1.00                                                                                                                                       | x                                         | 1.00                                  | 1.00    | 1.00                 |
|                                                                                                     | GDP basic price | 0.13                                                                                                                                       | x                                         | 0.50                                  | 0.50    | 0.50                 |
|                                                                                                     | Labour income   | 0.09                                                                                                                                       | x                                         | 0.38                                  | 0.38    | 0.38                 |
|                                                                                                     | Jobs            | 1.37                                                                                                                                       | x                                         | 6.31                                  | 16.31   | 6.31                 |
| Indirect                                                                                            | Output          | 1.48                                                                                                                                       | 1.58                                      | 1.43                                  | 1.52    | 1.64                 |
|                                                                                                     | GDP basic price | 0.33                                                                                                                                       | 0.56                                      | 0.73                                  | 0.50    | 0.69                 |
|                                                                                                     | Labour income   | 0.22                                                                                                                                       | 0.36                                      | 0.53                                  | 0.46    | 0.45                 |
|                                                                                                     | Jobs            | 3.98                                                                                                                                       | 9.49                                      | 9.09                                  | 21.50   | 6.90                 |
| Induced                                                                                             | Output          | 1.63                                                                                                                                       | 1.81                                      | 1.79                                  | 1.30    | 1.96                 |
|                                                                                                     | GDP basic price | 0.42                                                                                                                                       | 0.72                                      | 0.97                                  | 0.33    | 0.90                 |
|                                                                                                     | Labour income   | 0.26                                                                                                                                       | 0.43                                      | 0.62                                  | 0.27    | 0.54                 |
|                                                                                                     | Jobs            | 4.84                                                                                                                                       | 10.89                                     | 11.17                                 | 19.13   | 8.76                 |

**Table S4.** Comparison of economic indicators.

| <b>Values of Economic Indicators (Total Revenue, GDP, Labour Income, Employment) from Previous Studies.</b> |                                                  |                               |             |                 |               |
|-------------------------------------------------------------------------------------------------------------|--------------------------------------------------|-------------------------------|-------------|-----------------|---------------|
| <b>Sector</b>                                                                                               | <b>Variable</b>                                  | <b>Value<br/>(\$'000 000)</b> | <b>Year</b> | <b>Coverage</b> | <b>Source</b> |
| Ocean recreation                                                                                            | Total revenues/expenditures                      | 3791                          | 2005        | BC              | [21]          |
| Ocean transport                                                                                             | Total revenues/expenditures                      | 3330                          | 2005        | BC              | [21]          |
| Seafood                                                                                                     | Total revenues/expenditures                      | 1380                          | 2005        | BC              | [21]          |
| Marine construction                                                                                         | Total revenues/expenditures                      | 216                           | 2005        | BC              | [21]          |
| Ocean                                                                                                       | Revenues                                         | 11,600                        | 2005        | BC              | [21]          |
| Ocean                                                                                                       | GDP                                              | 5700                          | 2005        | BC              | [21]          |
| Ocean                                                                                                       | Labour income (i.e., wages and benefits)         | 4200                          | 2005        | BC              | [21]          |
| Ocean                                                                                                       | employment (person years)                        | 84,400                        | 2005        | BC              | [21]          |
| Seafood-capture                                                                                             | GDP                                              | 570                           | 2005        | BC              | [21]          |
| Seafood-capture                                                                                             | Sales value                                      | 910                           | 2005        | BC              | [21]          |
| Seafood-capture                                                                                             | Labour income (i.e., wages and benefits)         | 320                           | 2005        | BC              | [21]          |
| Seafood-capture                                                                                             | Employment (person years)                        | 84,400                        | 2005        | BC              | [21]          |
| Seafood processing                                                                                          | Employment                                       | 4826 jobs                     | 2011        | BC              | [22]          |
| Seafood processing                                                                                          | Employment                                       | 2400 jobs                     | 2013        | BC              | [23]          |
| Total maritime sector                                                                                       | GDP (direct)                                     | 17,685                        | 2006        | Canada          | [20]          |
| Total maritime sector                                                                                       | Employment                                       | 171,365 FTE                   | 2006        | Canada          | [20]          |
| Sea kayak                                                                                                   | Total gross revenue from 114 companies           | 14.26                         | 2005        | BC              | [1]           |
| Sea kayak                                                                                                   | Total annual revenue of survey respondents       | 4.7–8.5                       | 2015        | Salish Sea      | [1]           |
| Sea kayak                                                                                                   | Full time employee per company                   | 3.2–5.7 FTE                   | 2015        | BC              | [1]           |
| Sea kayak                                                                                                   | Full time employee per company                   | 3–4.6 FTE                     | 2015        | Salish Sea      | [1]           |
| Sea kayak                                                                                                   | Average of 86–129 full-time jobs in 29 companies | 4.7–8.5                       | 2015        | Salish Sea      | [1]           |
| Whale watching                                                                                              | Revenue                                          | 69                            | 1998        | BC              | [1]           |
| Sportfishing (Saltwater)                                                                                    | Employment                                       | 4235 jobs                     | 2005        | BC              | [24]          |
| Sportfishing (Saltwater) *                                                                                  | GDP                                              | 136.4                         | 2005        | BC              | [24]          |
| Cruise                                                                                                      | Direct expenditures                              | 49                            | 2012        | Victoria        | [10]          |
| Cruise                                                                                                      | Number of full and part-time employees           | 368                           | 2012        | Victoria        | [10]          |
| Cruise                                                                                                      | Wages                                            | 13.6                          | 2012        | Victoria        | [10]          |
| Ports and shipping                                                                                          | Number of full-time employees                    | 87,700 FTEs                   | 2016        | BC              | [9]           |
| Ports and shipping                                                                                          | GDP                                              | 9210                          | 2016        | BC              | [9]           |

\* Saltwater component estimated as 55% of total sportfishing GDP, based on saltwater proportion of sportfishing employment.

## References

- MacDuffee, M., A.R. Rosenberger, R. Dixon, A. Jarvela Rosenberger, C. Fox and P.C. Paquet. 2015. What's at stake: Threatened ecosystems and benefits in the Salish Sea. Raincoast Conservation Foundation. Sidney, British Columbia. Vers 1, pp. 108
- B.C. Data Catalogue Tourism Statistics. URL: <http://www2.gov.bc.ca/gov/content/data/statistics/business-industry-trade/industry/tourism>
- Ministry of Jobs, Tourism and Innovation (2012) The Value of Tourism in British Columbia: Trends from 2000 to 2010. 42pp.
- B.C. Data Catalogue Industry Statistics. URL: <https://www2.gov.bc.ca/gov/content/data/statistics>
- Regional Outdoor Recreation Opportunities Study for Metro Vancouver and Fraser Valley Regional District, March 10, 2011. Phase 1 Demand Analysis Report. Prepared by LEES + Associates, Mustel Group, Urban Futures. URL: <http://www.metrovancouver.org/services/parks/ParksPublications/Regional%20Outdoor%20Recreation%20Opportunities%20Study%20-%20Phase%20One%20Demand%20Analysis%20Report%20-%20March%202011.pdf>. 47pp.
- Bodtker K, Shaikh S, Towers JR, Scott-Ashe J, Robb C, Gilliard G, Wright K (2015). Connecting Marine Ecotourism Values in Northern Vancouver Island with Marine Protected Areas. Living Oceans Society.
- Tourism Vancouver Market Research (1998-2015 data). URL: [https://res.cloudinary.com/simpleview/image/upload/v1/clients/vancouverbc/cruise\\_volume\\_86\\_15\\_dbb3a2a0-d504-4d46-ba6d-51e38be5029f.pdf](https://res.cloudinary.com/simpleview/image/upload/v1/clients/vancouverbc/cruise_volume_86_15_dbb3a2a0-d504-4d46-ba6d-51e38be5029f.pdf)
- Port Metro Vancouver Cruise Statistics Report 2008-2015. URL: <https://www.portvancouver.com/wp-content/uploads/2015/11/Cruise-Statistics-Monthly-2008-to-2015.pdf>.
- InterVISTAS (2017) Port of Vancouver 2016 Economic Impact Study. 100pp.
- Business Research & Economic Advisors (2013) The Economic Contribution of Cruise Tourism in Victoria 2012. 12pp.
- Fisheries and Oceans Canada (2012) Survey of Recreational Fishing in Canada 2010. DFO, Ontario, 27pp.
- GSGislason & Associates (2004) British Columbia Seafood Sector and Tidal Water Recreational Fishing: A Strengths, Weaknesses, Opportunities, and Threats Assessment. Final Report. 234pp.
- DataBC. BC Seafood Harvest, Landed and Wholesale Value. URL: <https://catalogue.data.gov.bc.ca/dataset/bc-seafood-harvest-landed-and-wholesale-value>.
- Statistics Canada (2012) Shipping in Canada 2011. Catalogue no. 54-205-X. Minister of Industry, Ottawa. 191pp.
- Statistics Canada Data. <https://www150.statcan.gc.ca/n1/en/type/data?MM=1>.
- LEGG (2004) Marine Industry Benefits Study: Economic Impact of the Canadian Marine Transportation Industry Toronto, Canada, 108pp.
- B.C. Data Catalogue Industry Statistics
- Principal statistics for manufacturing industries, Annual Survey of Manufacturing and Logging Industries, Seafood product preparation and packaging [NAICS 3117]
- Ecotrust Canada (2009) Briefing: A cautionary tale about ITQs in BC fisheries
- Pinfold G (2009) Economic Impact of Marine Related Activities in Canada. Statistical and Economic Analysis Series. Publication No. 1-1, 125p.
- GSGislason & Associates (2007) Economic Contribution of the Oceans Sector in British Columbia. 64pp.
- BC Ministry of Agriculture. 2011. URL: [http://www2.gov.bc.ca/assets/gov/farming-natural-resources-and-industry/agriculture-and-seafood/statistics/industry-and-sector-profiles/employment/2011\\_british\\_columbia\\_fish\\_processing\\_employment\\_survey\\_results.pdf](http://www2.gov.bc.ca/assets/gov/farming-natural-resources-and-industry/agriculture-and-seafood/statistics/industry-and-sector-profiles/employment/2011_british_columbia_fish_processing_employment_survey_results.pdf).
- Stroemer C, Wilson M (2013) British Columbia's Fisheries and Aquaculture Sector, 2012 Edition. BC Stats, Victoria. 98pp.
- Survey of Recreational Fishing in Canada (2005). Fisheries and Oceans Canada, Ottawa, Ontario. URL: [http://www.dfo-mpo.gc.ca/stats/rec/can/2005/REC2005\\_EN\\_20070727.pdf](http://www.dfo-mpo.gc.ca/stats/rec/can/2005/REC2005_EN_20070727.pdf).
